# Supplementary material for: Prospecting elite donor plants and characterization of endogenous hormonal status in seeds of Brazilian chestnuts (Lecythidaceae)
Source: Research Square preprint supplement (doi:10.21203/rs.3.rs-6866798/v1), 2025-07-25
Supplement: Supplementary file 1 [file 1aa770eaa0563c848a694a73.docx]

**Figure 1.** Agarose gel electrophoresis showing DNA amplification profiles obtained using 11 ISSR primers (UBC 841, UBC 852, UBC 853, UBC 868, UBC 873, UBC 880, UBC 812, UBC 818, UBC 808, UBC 826, and UBC 811), highlighting the molecular weight marker (M) and the banding patterns generated for individuals of the species *Lecythis lanceolata* (Ll1 to Ll6) and *L. pisonis* (Lp1 to Lp6), used for genetic variability analysis.
