# Supplementary material for: Prospecting elite donor plants and characterization of endogenous hormonal status in seeds of Brazilian chestnuts (Lecythidaceae)
Source: Research Square preprint supplement (doi:10.21203/rs.3.rs-6866798/v1), 2025-07-25
Supplement: Supplementary file 3 [file 416a1d42320cafed7c4c1b40.xlsx]

## Sheet: DNA SAPUCAIA
	UBC 808	UBC 808	UBC 808	UBC 808	UBC 808	UBC 808	UBC 808	UBC 811	UBC 811	UBC 811	UBC 811	UBC 811	UBC 811	UBC 811	UBC 811	UBC 811	UBC 811	UBC 811	UBC 811	UBC 811	UBC 811	UBC 812	UBC 812	UBC 812	UBC 812	UBC 812	UBC 812	UBC 812	UBC 812	UBC 818	UBC 818	UBC 818	UBC 818	UBC 818	UBC 826	UBC 826	UBC 826	UBC 826	UBC 826	UBC 826	UBC 826	UBC 826	UBC 826	UBC 826	UBC 826	UBC 826	UBC 841	UBC 841	UBC 841
Gen	Allele 1	Allele 2	Allele 3	Allele 4	Allele 5	Allele 6	Allele 7	Allele 1	Allele 2	Allele 3	Allele 4	Allele 5	Allele 6	Allele 7	Allele 8	Allele 9	Allele 10	Allele 11	Allele 12	Allele 13	Allele 14	Allele 1	Allele 2	Allele 3	Allele 4	Allele 5	Allele 6	Allele 7	Allele 8	Allele 1	Allele 2	Allele 3	Allele 4	Allele 5	Allele 1	Allele 2	Allele 3	Allele 4	Allele 5	Allele 6	Allele 7	Allele 8	Allele 9	Allele 10	Allele 11	Allele 12	Allele 1	Allele 2	Allele 3
Lp 1	0	0	1	1	0	0	1	0	1	1	0	0	0	1	0	0	0	0	1	1	1	1	0	1	0	1	1	1	1	1	1	1	1	1	1	0	1	0	1	1	1	1	1	1	1	1	0	0	0
Lp 2	1	1	0	0	1	1	1	0	1	1	1	0	0	1	1	0	0	0	0	1	0	1	1	1	1	1	1	1	1	1	1	1	1	1	0	1	1	0	1	0	1	1	0	0	1	1	0	0	0
Lp 3	0	0	0	0	1	1	0	1	1	0	0	0	1	0	1	0	0	0	0	0	0	1	1	1	0	1	1	1	0	1	1	1	1	0	1	0	0	1	0	1	1	0	0	0	1	0	0	0	0
Lp 4	0	0	0	0	1	1	0	1	1	1	1	0	1	1	0	1	1	0	1	0	1	1	1	1	1	1	1	1	0	1	1	0	1	1	1	0	0	0	1	0	1	1	0	1	1	0	0	0	0
Lp 5	0	0	0	0	0	0	0	1	0	0	0	0	1	0	0	0	0	0	0	1	1	1	0	0	1	1	1	0	1	1	1	0	1	0	1	0	0	0	1	1	1	0	0	0	1	0	0	0	0
Lp 6	0	0	0	0	1	1	0	0	0	0	1	0	1	1	0	0	0	0	0	1	1	1	0	1	0	1	1	0	0	1	1	0	1	1	1	0	1	0	1	0	1	1	0	1	1	1	0	0	0
Ll1	1	1	1	1	1	0	1	0	1	0	0	1	0	1	0	0	1	1	0	1	0	0	1	0	1	0	0	0	0	1	1	0	1	0	0	0	0	1	0	0	0	0	1	1	1	1	1	1	1
Ll2	1	1	1	1	0	0	1	0	1	1	0	1	0	1	0	0	1	1	0	1	1	0	1	0	1	0	0	0	0	1	1	0	1	0	0	0	0	1	0	0	0	0	1	1	1	1	0	0	1
Ll3	0	1	1	1	0	0	1	0	1	1	0	1	0	1	0	1	0	1	1	1	0	0	1	1	1	1	0	0	0	1	1	0	1	0	0	0	0	1	0	0	0	1	1	1	1	0	0	1	1
Ll4	1	1	1	1	0	0	1	0	0	0	0	1	1	0	0	0	1	1	1	1	0	0	1	1	1	1	0	0	0	1	1	0	1	1	0	0	0	1	0	0	0	0	0	0	1	1	1	1	1
Ll5	1	1	1	1	0	0	1	0	0	0	0	1	0	0	0	0	1	1	1	1	0	0	1	0	1	1	0	1	0	1	1	0	1	1	0	0	1	1	0	1	1	0	0	1	1	1	0	0	1
Ll6	1	1	1	1	0	0	1	0	1	0	0	1	0	1	0	1	0	1	0	1	1	0	1	0	1	1	0	0	0	1	1	0	1	0	0	0	0	1	0	0	1	1	1	0	1	1	1	1	1
[truncated: 56 more columns]
